# Supplementary material for: Watermelon seeds in modulating oxidative stress and inflammatory pathways in rheumatoid arthritis: In Silico and In Vivo Insights
Source: Research Square preprint supplement (doi:10.21203/rs.3.rs-8734501/v1), 2026-01-30
Supplement: Supplementary file 1 [file 80b946bca576d53592ba796d.docx]

**Table 2.1:** Treatment groups

| **Groups** | **Treatment** | **Condition** |
| --- | --- | --- |
| **G0** | Standard diet only | No disease |
| **G1** | Standard diet only | RA |
| **G2** | 200mg WSP + standard diet | RA |
| **G3** | 300mg WSP + standard diet | RA |
| **G4** | 400mg WSP + standard diet | RA |

G: Group, WSP: Watermelon Seed powder, RA: Rheumatoid Arthritis, while G0: Negative control group, G1: Positive control group, G2: 2O0mg WSP + standard diet, T3: 300mg WSP + standard diet, G4: 400mg WSP + standard diet

**Table 3.1:** Nutritional composition of Watermelon seeds

| **Component** | **Seeds** |
| --- | --- |
| Moisture (%) | 5.45 ± 0.10 |
| Ash (%) | 4.90 ± 0.11 |
| Crude Protein (%) | 23.84 ± 0.25 |
| Crude Fat (%) | 39.62 ± 0.30 |
| Crude Fiber (%) | 8.73 ± 0.19 |
| Carbohydrate (%) | 17.46 ± 0.12 |
| Potassium (mg /100g) | 442.6 ± 18.9 |
| Calcium (mg /100g) | 56.9 ± 9.6 |
| Magnesium (mg /100g) | 26.4 ± 1.2 |
| Sodium (mg /100g) | 42.8 ± 1.9 |
| Phosphorus (mg /100g) | 487.3 ± 14.7 |
| Iron (mg /100g) | 14.7 ± 0.9 |
| Zinc (mg /100g) | 5.26 ± 0.14 |
| Manganese (mg /100g) | 2.14 ± 0.09 |

**Table 3.2:** Antioxidant activity and phytochemical profiling of WSP

| **Solvent** | **DPPH (%)** | **DPPH (μMTrolax/g)** | **ABTS (µM Fe2+/100 g)** | **ABTS (µMTrolox/g)** | **TFC (mg QE/100g)** | **TPC (mg GAE/100g)** |
| --- | --- | --- | --- | --- | --- | --- |
| Methanol | 58.17±0.89g | 1.51±0.05ab | 79.57±1.79a | 1.42±0.01a | 45.97±0.07c | 682.0±3.60d |
| Ethanol | 66.88±0.91c | 1.32±0.06ab | 39.65±1.54h | 0.76±0.02e | 63.31±1.14e | 562.0±2.64  g |
| Acetone | 46.56±0.91i | 1.34±0.17ab | 69.75±2.22d | 1.54±0.02c | 42.40±0.02i | 609.3±4.04f |
| Hexane | 62.38±0.38d | 1.75±0.22ab | 72.42±2.58c | 1.52±0.01bc | 54.32±0.82g | 498.0±6.56i |
| Aqueous Ethanol | 73.50±1.03b | 1.98±0.53bc | 80.31±1.75a | 1.78±0.01a | 71.47±0.98b | 766.7±3.05c |

**Table 3.3** Interaction of Quercetin, Ferulic Acid, and β-Sitosterol with Superoxide dismutase

| **Ligand** | **Residues** | **Distance** | **Category** | **Type** | **Energy (Kcal/mol)** |
| --- | --- | --- | --- | --- | --- |
| Quercetin | ARG209 | 1.67586 | Hydrogen Bond | Conventional Hydrogen Bond | -8.2 |
| LYS221 | 1.63472 | Hydrogen Bond | Conventional Hydrogen Bond |
| Ferulic Acid | ARG209 | 1.67586 | Hydrogen Bond | Conventional Hydrogen Bond | -6.8 |
| ARG209 | 2.05743 | Hydrogen Bond | Conventional Hydrogen Bond |
| β-Sitosterol | ARG209 | 1.67586 | Hydrogen Bond | Conventional Hydrogen Bond | -7.8 |
| ARG209 | 2.05743 | Hydrogen Bond | Conventional Hydrogen Bond |

**Table 3.4:** Effect of WSP on Body weight (g) and Organ to body Weights ratio (g/100g)

| **Group** | **Body weight** | **R. Kidney** | **L. Kidney** | **Liver** | **Heart** | **Lungs** | **Spleen** |
| --- | --- | --- | --- | --- | --- | --- | --- |
| **G0** | 210.46±7.59a | 0.483±0.02a | 0.58±0.02a | 7.65±0.33a | 0.45±0.02a | 1.49±0.08a | 0.46±0.03a |
| **G1** | 185.31±9.08b | 0.43±0.02b | 0.52±0.02b | 7.41±0.71a | 0.36±0.02c | 1.42±0.09a | 0.44±0.03a |
| **G2** | 189.76±11.11b | 0.44±0.03b | 0.54±0.02ab | 7.46±0.29a | 0.38±0.02bc | 1.45±0.08a | 0.45±0.02a |
| **G3** | 194.14±4.72ab | 0.45±0.03ab | 0.55±0.01ab | 7.52±0.43a | 0.41±0.04ab | 1.46±0.06a | 0.46±0.04a |
| **G4** | 201.93±15.80ab | 0.47±0.02ab | 0.57±0.02a | 7.59±0.09a | 0.43±0.03a | 1.47±0.13a | 0.45±0.01a |
| **F.ratio** | 2.81ns | 3.02ns | 2.19ns | 0.15ns | 5.87ns | 0.21ns | 0.45ns |

G0: normal group + normal diet, G1: arthritis group+ normal diet, G2: arthritis group+ normal diet + WSP (200mg/ kg/day), G3: arthritis group+ normal diet + WSP (300mg/ kg/day), G4: arthritis group+ normal diet + WSP (400mL/ kg/day)

**Table 3.5:** Effect of WSP on Glucose and Lipid Metabolism

| **Group** | **Glucose**  **(g/dL)** | **TC**  **(g/dL)** | **TG**  **(g/dL)** | **HDL (g/dL)** | **LDL**  **(g/dL)** | **VLDL**  **(g/dL)** | **Athrogenic Index** |
| --- | --- | --- | --- | --- | --- | --- | --- |
| **G0** | 89.37±4.47d | 93.21±4.91a | 72.19±3.73c | 41.86±0.36a | 36.91±0.18c | 14.43±0.23c | 1.23±0.07c |
| **G1** | 120.59±0.88a | 98.65±3.42a | 96.15±7.72a | 34.28±1.22c | 45.13±2.78a | 19.23±1.64a | 1.87±0.13a |
| **G2** | 110.83±5.50b | 98.20±0.96a | 91.49±4.70a | 36.16±0.62bc | 43.75±1.91a | 18.29±0.90a | 1.71±0.10ab |
| **G3** | 104.41±5.79bc | 96.75±6.51a | 87.53±2.44ab | 37.63±1.81b | 41.62±2.15ab | 17.50±1.07ab | 1.57±0.05b |
| **G4** | 97.32±4.71cd | 95.30±3.64a | 81.06±3.97b | 39.93±0.99a | 39.16±2.35bc | 16.21±0.16b | 1.38±0.07c |
| **F.ratio** | 20.37** | 0.80ns | 11.19** | 21.57** | 7.77* | 11.10** | 25.43*** |

G0: normal group + normal diet, G1: arthritis group+ normal diet, G2: arthritis group+ normal diet + WSP (200mg/ kg/day), G3: arthritis group+ normal diet + WSP (300mg/ kg/day), G4: arthritis group+ normal diet + WSP (400mL/ kg/day)

**Table 3.6:** Effect of WSP on Liver Function Test

| **Serum indices** | **ALP**  **(U/L)** | **AST**  **(U/L)** | **ALT**  **(U/L)** | **Bilirubin**  **(mg/dl)** |
| --- | --- | --- | --- | --- |
| **G0** | 138.23±5.94d | 83.18±4.49d | 41.67±1.04c | 0.48±0.02d |
| **G1** | 167.94±3.92a | 127.57±6.79a | 59.97±5.57a | 0.87±0.04a |
| **G2** | 159.63±6.05ab | 113.68±2.87b | 54.49±1.80b | 0.81±0.01b |
| **G3** | 151.19±9.30bc | 101.64±2.99c | 51.18±2.38b | 0.76±0.04b |
| **G4** | 145.47±4.30cd | 97.31±4.80c | 45.39±1.44c | 0.68±0.03c |
| **F.ratio** | 10.61* | 39.85*** | 18.27** | 80.05*** |

G0: normal group + normal diet, G1: arthritis group+ normal diet, G2: arthritis group+ normal diet + WSP (200mg/ kg/day), G3: arthritis group+ normal diet + WSP (300mg/ kg/day), G4: arthritis group+ normal diet + WSP (400mL/ kg/day)

**Table 3.7:** Effect of WSP on Serum Electrolytes and Renal Function Markers

| **Group** | **Na**  **(mmol/L)** | **K**  **(mmol/L)** | **Cl (mmol/L)** | **Creatinine**  **(mg/dL)** | **Urea**  **(mg/dL)** |
| --- | --- | --- | --- | --- | --- |
| **G0** | 147.38±3.95a | 4.733±0.25a | 107.03±4.82b | 0.36±0.02e | 24.43±0.79c |
| **G1** | 126.71±4.52b | 3.27±0.15d | 121.93±9.37a | 0.89±0.03a | 39.17±0.94a |
| **G2** | 128.51±9.03b | 3.43±0.12cd | 117.36±6.09ab | 0.80±0.08b | 35.76±2.92a |
| **G3** | 131.17±10.01b | 3.69±0.23bc | 112.85±6.14ab | 0.72±0.01c | 31.52±2.61b |
| **G4** | 135.79±10.05ab | 3.97±0.21b | 110.12±1.04b | 0.63±0.01d | 28.35±1.44b |
| **F.ratio** | 3.22ns | 25.63*** | 2.79ns | 79.96*** | 27.03*** |

G0: normal group + normal diet, G1: arthritis group+ normal diet, G2: arthritis group+ normal diet + WSP (200mg/ kg/day), G3: arthritis group+ normal diet + WSP (300mg/ kg/day), G4: arthritis group+ normal diet + WSP (400mL/ kg/day)

**Table 3.8:** Effect of WSP on Haematological Parameters

| **Group** | **RBC**  **(10^6/µl)** | **Hb**  **(g/dL)** | **HCT**  **(%)** | **MCV (μm3)** | **MCH**  **(pg)** | **MCHC (g/dL)** |
| --- | --- | --- | --- | --- | --- | --- |
| **G0** | 7.65±0.10a | 13.39±1.08a | 43.49±2.35a | 56.85±2.72a | 17.50±0.20a | 30.79±2.76a |
| **G1** | 6.92±0.09c | 11.47±0.55b | 39.28±0.97b | 56.76±2.91a | 16.57±0.52ab | 29.20±1.27a |
| **G2** | 7.12b±0.40c | 11.61±0.59b | 40.52±0.94b | 56.92±2.44a | 16.30±0.32b | 28.64±1.13a |
| **G3** | 7.310±0.12abc | 11.73±0.13b | 40.98±1.44ab | 56.07±0.32a | 16.04±0.74b | 28.61±0.42a |
| **G4** | 7.46±0.40ab | 11.99±0.64b | 41.39±1.37ab | 55.41±1.94a | 16.05±1.07b | 28.96±1.91a |
| **F ratio** | 3.53* | 4.11* | 3.14ns | 0.25ns | 2.58ns | 0.84ns |

G0: normal group + normal diet, G1: arthritis group+ normal diet, G2: arthritis group+ normal diet + WSP (200mg/ kg/day), G3: arthritis group+ normal diet + WSP (300mg/ kg/day), G4: arthritis group+ normal diet + WSP (400mL/ kg/day)

**Table 3.9:** Effect of WSP on White Blood Cells and Differentials

| **Group** | **WBC**  **(10^3 µL)** | **Lymphocyte (%)** | **Neutrophil (%)** | **Monocytes (%)** | **Eosinophil (%)** | **Basophil (%)** |
| --- | --- | --- | --- | --- | --- | --- |
| **G0** | 7.35±0.36c | 59.23±1.51a | 37.55±2.36a | 0.63±0.03d | 2.47±0.20d | 0.11±0.01d |
| **G1** | 9.49±0.17a | 58.29±2.87a | 36.77±1.63a | 0.85±0.03a | 3.87±0.22a | 0.21±0.01a |
| **G2** | 9.01±0.63ab | 58.51±2.37a | 37.09±3.39a | 0.79±0.04b | 3.44±0.13b | 0.17±0.01b |
| **G3** | 8.68±0.41b | 58.91±3.14a | 37.39±2.08a | 0.72±0.02c | 2.83±0.14c | 0.15±0.01c |
| **G4** | 7.92±0.33c | 59.03±1.82a | 37.54±1.83a | 0.68±0.02cd | 2.62±0.13cd | 0.13±0.00d |
| **F ratio** | 13.11** | 0.08ns | 0.06ns | 29.85*** | 36.91*** | 60.40*** |

G0: normal group + normal diet, G1: arthritis group+ normal diet, G2: arthritis group+ normal diet + WSP (200mg/ kg/day), G3: arthritis group+ normal diet + WSP (300mg/ kg/day), G4: arthritis group+ normal diet + WSP (400mL/ kg/day)
